# Supplementary material for: Heart of Darkness: A Symptomatic Reading
Source: Royal Society of Chemistry journal article supplement (doi:10.1039/b925974k), 2007-09-13
Supplement: b925974k.pdf [file b925974k.pdf]

**Electronic Supplementary Information (ESI) for**

**Mono- and bis-amidinate 2,6-xylylimido vanadium chlorides:  
synthesis, structure, and reactivity.**

**Sinai Aharonovich, Mark Botoshanski, Boris Tumanskii, Kotohiro Nomura, Robert M. Waymouth  
and Moris S. Eisen**

\*To whom correspondence should be addressed. E-mail: [chmoris@tx.technion.ac.il](mailto:chmoris@tx.technion.ac.il)

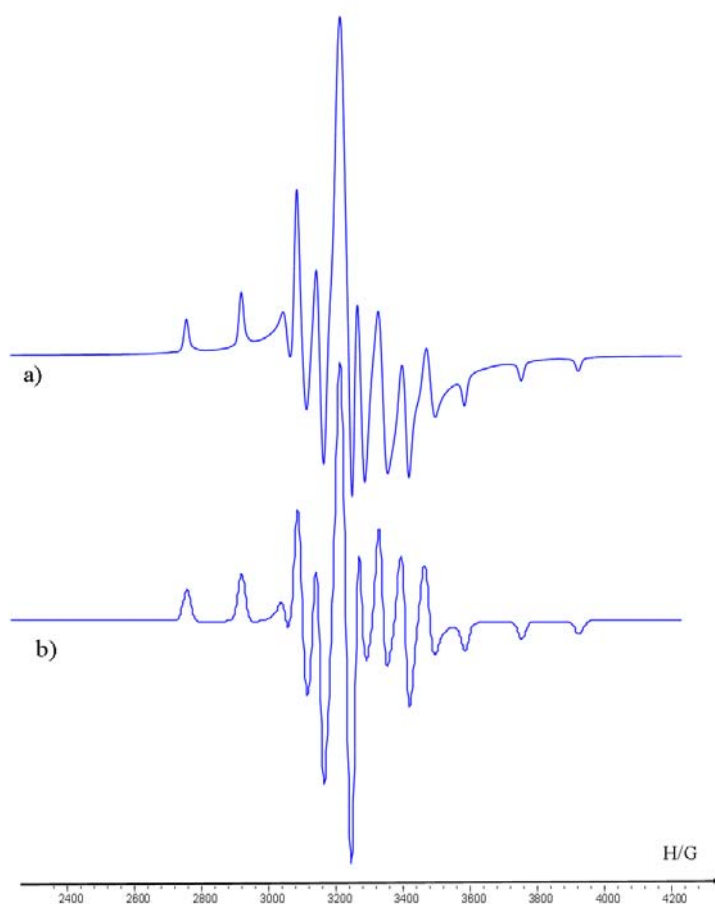

Fig. S1 (a) ESR spectrum of frozen solution of complex **6** (130K, toluene-*d*8) and (b) its simulation. The result of the simulation of anisotropic signal with the EasySpin toolbox for Matlab (Stoll, S.; Schweiger, A. *J. Magn. Reson.* **2006**, 178, 42–55) agrees reasonably well with the experimental one.
